# Supplementary material
Source: publisher site journal article supplement (https://www.kjim.org/upload/media/kjim-2020-470-appendix1.pdf)
Supplement: Supplementary file 1 [file kjim-2020-470-appendix1.pdf]

## **APPENDIX 1. The questionnaire: simple English version**

### **Questions about overall home oxygen prescription**

- 1) Have you ever issued a home oxygen therapy prescription?
- 2) Do you know the criteria for issuing an oxygen prescription?
- 3) How many oxygen prescriptions do you issue per month (including both outpatient and inpatient)?

### **Questions about the prescription in outpatients**

- 1) Have you ever issued an oxygen prescription to patients with chronic obstructive pulmonary disease?
- 2) Have you ever restricted the use of oxygen to patients with an oxygen prescription? When?
- 3) Which tests do you perform when issuing oxygen prescriptions?
- 4) How do you usually prescribe the initial oxygen prescription flow rate and time when issuing an oxygen prescription?
- 5) How do you prescribe oxygen in case of sleep or exercise?

### **Questions for improving home oxygen therapy services**

- 1) Do you re-evaluate your need for home oxygen treatment if you have issued an oxygen prescription? How often do you?
- 2) Do you provide any training materials on home oxygen treatment when issuing oxygen prescriptions? Which training materials do you have?
- 3) Why do you not prescribe home oxygen therapy? If a new policy about home oxygen treatment is developed, are you interested in oxygen therapy?
- 4) Do you think it is necessary to re-assess the need for home oxygen treatment after issuing an oxygen prescription? If you need a re-evaluation, how often do you think you should?
- 5) Do you think that a link with "home nurse service" or changes in the payment standard for home oxygen care will be necessary to activate home oxygen therapy services?

### **Questions about prescription of borderline hypoxemic state**

- 1) Have you ever issued oxygen prescriptions to patients with borderline hypoxemia (oxygen saturation 92 to 93%) who do not meet the criteria for issuing oxygen prescriptions? In what cases did you decide to use oxygen?
- 2) Do you re-evaluate the need for home oxygen therapy if you are issued an oxygen prescription to patients with borderline hypoxemia?

### **Questions about prescribing home oxygen therapy to patients with acute respiratory distress at discharge**

- 1) Have you ever issued an oxygen prescription when an inpatient was discharged? In what cases?
- 2) Have you ever restricted the use of oxygen for discharge patients when issuing oxygen prescriptions? In what case, mainly?
- 3) Do you re-evaluate the need for home oxygen treatment after issuing an oxygen prescription?
